# Supplementary material
Source: publisher figshare collection journal article supplement (https://sage.figshare.com/ndownloader/files/13291994)
Supplement: Supplementary file 1 [file 13291994]

## Supplemental Material

**Suppl Table 1:** Scores on the individual items of the SleepSure questionnaire

| Item                          | Group   |              | Comparison |        |
|-------------------------------|---------|--------------|------------|--------|
|                               | Control | Intervention |            |        |
|                               | n= 97   | n=109        | p-value    |        |
| Depth of sleep                | Mean    | 4.85         | 6.03       | 0.001  |
|                               | 95% CI  | 4.39, 5.31   | 5.54, 6.52 |        |
|                               | SD (n)  | 2.20 (89)    | 2.47 (96)  |        |
| Ease of getting to sleep      | Mean    | 4.89         | 5.92       | 0.01   |
|                               | 95% CI  | 4.37, 5.41   | 5.36, 6.48 |        |
|                               | SD (n)  | 2.52 (89)    | 2.81 (96)  |        |
| Frequency of waking           | Mean    | 4.4          | 5.17       | 0.06   |
|                               | 95% CI  | 3.82, 4.98   | 4.62, 5.72 |        |
|                               | SD (n)  | 2.79 (89)    | 2.70 (93)  |        |
| Ease of Getting back to sleep | Mean    | 4.65         | 6.33       | <0.001 |
|                               | 95% CI  | 4.04, 5.26   | 5.78, 6.88 |        |
|                               | SD (n)  | 2.92 (88)    | 2.76 (95)  |        |
| Quality of sleep              | Mean    | 5.07         | 6.09       | 0.007  |
|                               | 95% CI  | 4.54, 5.60   | 5.57, 6.61 |        |
|                               | SD (n)  | 2.54 (89)    | 2.60 (96)  |        |

|                   |        |            |            |       |
|-------------------|--------|------------|------------|-------|
| Length of sleep   | Mean   | 5.13       | 6.22       | 0.003 |
|                   | 95% CI | 4.64, 5.61 | 5.71, 6.73 |       |
|                   | SD (n) | 2.34 (89)  | 2.55 (96)  |       |
| Noise disturbance | Mean   | 5.42       | 6.75       | 0.001 |
|                   | 95% CI | 4.79, 6.04 | 6.24, 7.26 |       |
|                   | SD (n) | 3.00 (88)  | 2.54 (96)  |       |
| Light disturbance | Mean   | 6.55       | 7.47       | 0.021 |
|                   | 95% CI | 5.94, 7.16 | 6.98, 7.96 |       |
|                   | SD (N) | 2.94 (89)  | 2.44 (95)  |       |

CI = Confidence Intervals

SD = Standard Deviation

**Suppl Table 2:** Adverse effects from using the intervention (n = 79)

| Adverse effect                                | Number (%) |
|-----------------------------------------------|------------|
| Uncomfortable earplugs                        | 16         |
| Uncomfortable eye mask                        | 2          |
| Feeling of confusion                          | 1          |
| Hearing own heartbeat when using the earplugs | 1          |
| Claustrophobia from the eye mask              | 1          |
| Distortion of perceived time                  | 1          |

## Appendix 1

### SleepSure Questionnaire

|                                                               |   |   |   |   |                |   |   |           |    |
|---------------------------------------------------------------|---|---|---|---|----------------|---|---|-----------|----|
| <b>(1) Last night the depth of my sleep was:</b>              |   |   |   |   |                |   |   |           |    |
| Very deep                                                     |   |   |   |   | Very light     |   |   |           |    |
| 1                                                             | 2 | 3 | 4 | 5 | 6              | 7 | 8 | 9         | 10 |
| <b>(2). Last night getting to sleep was:</b>                  |   |   |   |   |                |   |   |           |    |
| Very easy                                                     |   |   |   |   | Very difficult |   |   |           |    |
| 1                                                             | 2 | 3 | 4 | 5 | 6              | 7 | 8 | 9         | 10 |
| <b>(3) Last night I woke from sleep:</b>                      |   |   |   |   |                |   |   |           |    |
| Not at all                                                    |   |   |   |   | A lot          |   |   |           |    |
| 1                                                             | 2 | 3 | 4 | 5 | 6              | 7 | 8 | 9         | 10 |
| <b>(4) Last night when I woke, getting back to sleep was:</b> |   |   |   |   |                |   |   |           |    |
| Very easy                                                     |   |   |   |   | Very difficult |   |   |           |    |
| 1                                                             | 2 | 3 | 4 | 5 | 6              | 7 | 8 | 9         | 10 |
| <b>(5) Last night I slept:</b>                                |   |   |   |   |                |   |   |           |    |
| Not at all                                                    |   |   |   |   |                |   |   | All night |    |
| 1                                                             | 2 | 3 | 4 | 5 | 6              | 7 | 8 | 9         | 10 |
| <b>(6) Last night overall my sleep was:</b>                   |   |   |   |   |                |   |   |           |    |
| Terrible                                                      |   |   |   |   |                |   |   | Excellent |    |
| 1                                                             | 2 | 3 | 4 | 5 | 6              | 7 | 8 | 9         | 10 |
| <b>(7) Last night the noise level was:</b>                    |   |   |   |   |                |   |   |           |    |

|                                                                 |   |          |   |                  |                 |   |               |   |    |
|-----------------------------------------------------------------|---|----------|---|------------------|-----------------|---|---------------|---|----|
| Not at all disrupting                                           |   |          |   |                  | Very disturbing |   |               |   |    |
| 1                                                               | 2 | 3        | 4 | 5                | 6               | 7 | 8             | 9 | 10 |
| <b>(8) Last night the light level was:</b>                      |   |          |   |                  |                 |   |               |   |    |
| Not at all disrupting                                           |   |          |   |                  | Very disturbing |   |               |   |    |
| 1                                                               | 2 | 3        | 4 | 5                | 6               | 7 | 8             | 9 | 10 |
| <b>(9) Last night to help me sleep I had the option to use:</b> |   |          |   |                  |                 |   |               |   |    |
| Circle all that apply                                           |   |          |   |                  |                 |   |               |   |    |
| Eye mask                                                        |   | Earplugs |   | Sleeping tablets |                 |   | None of these |   |    |
| <b>(10) Last night to help me sleep I used:</b>                 |   |          |   |                  |                 |   |               |   |    |
| Circle all that apply                                           |   |          |   |                  |                 |   |               |   |    |
| Eye mask                                                        |   | Earplugs |   | Sleeping tablets |                 |   | None of these |   |    |
| Comments:                                                       |   |          |   |                  |                 |   |               |   |    |

**Questions 1-5** - based upon the original five point Richards Campbell Sleep

Questionnaire Score (RCSQ)

**Question 6** - used by many studies as an addition to the original five point RCSQ.

**Question 7-8** - used to reflect the effectiveness of earplugs and eye masks mitigating noise and light disturbances.

**Questions 9-10** - used to record availability and use of sleep aides.

Sleep Quality score = (sum questions one to eight)/8
